# Supplementary material for: Preparation, Surface Characterization, and Water Resistance of Silicate and Sol-Silicate Inorganic–Organic Hybrid Dispersion Coatings for Wood
Source: MDPI journal article supplement (doi:10.3390/ma14133559), 2021-06-25
Supplement: s1 [file s1]

Article

# Preparation, Surface Characterization, and Water Resistance of Silicate and Sol-Silicate Inorganic–Organic Hybrid Dispersion Coatings for Wood

Arnaud Maxime Cheumani Yona <sup>1,2,\*</sup>, Jure Žigon <sup>1</sup>, Alexis Ngueteu Kamlo <sup>2</sup>, Matjaž Pavlič <sup>1</sup>, Sebastian Dahle <sup>1</sup>, and Marko Petrič <sup>1</sup>

<sup>1</sup> Department of Wood Science and Technology, Biotechnical Faculty, University of Ljubljana, Jamnikarjeva ulica 101, SI-1000 Ljubljana, Slovenia; jure.zigon@bf.uni-lj.si (J.Ž.);

Matjaz.Pavlic@bf.uni-lj.si (M.P.); Sebastian.Dahle@bf.uni-lj.si (S.D.); marko.petric@bf.uni-lj.si (M.P.)

<sup>2</sup> Macromolecular Research Team, Faculty of Science, University of Yaoundé 1, Yaoundé P.O. 812, Cameroon; akngueteu@yahoo.fr

\* Correspondence: ArnaudMaximeCheumani.Yona@bf.uni-lj.si

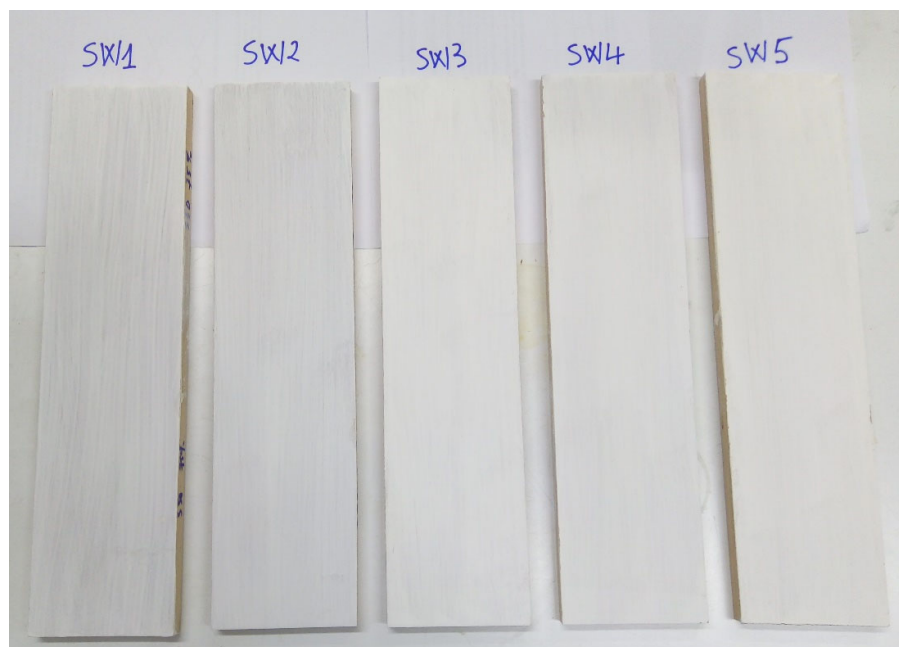

**Figure S1.** A photograph of the coatings at the surface of wood (application rate 220 kg m<sup>-2</sup>).

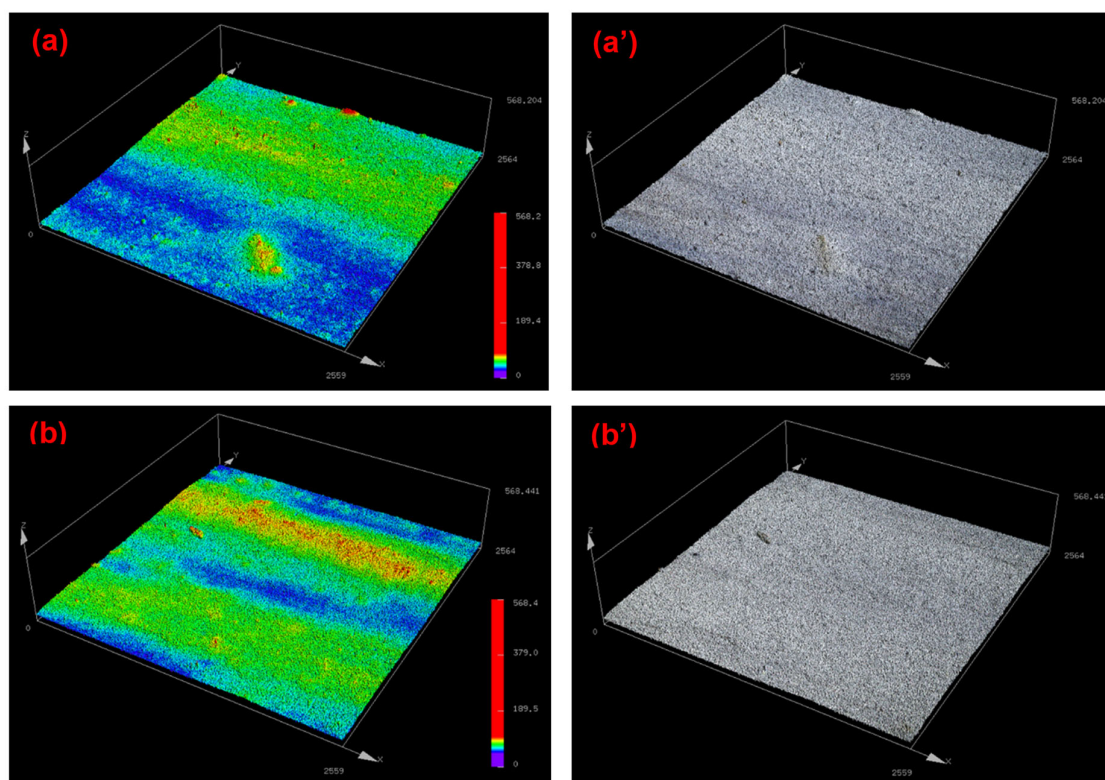

**Figure S2.** 3D micrographs at magnification 5× of a silicate coating SW1 (a, a') and a sol-silicate SW4 (b, b') illustrating typical features of the coatings at this magnification.

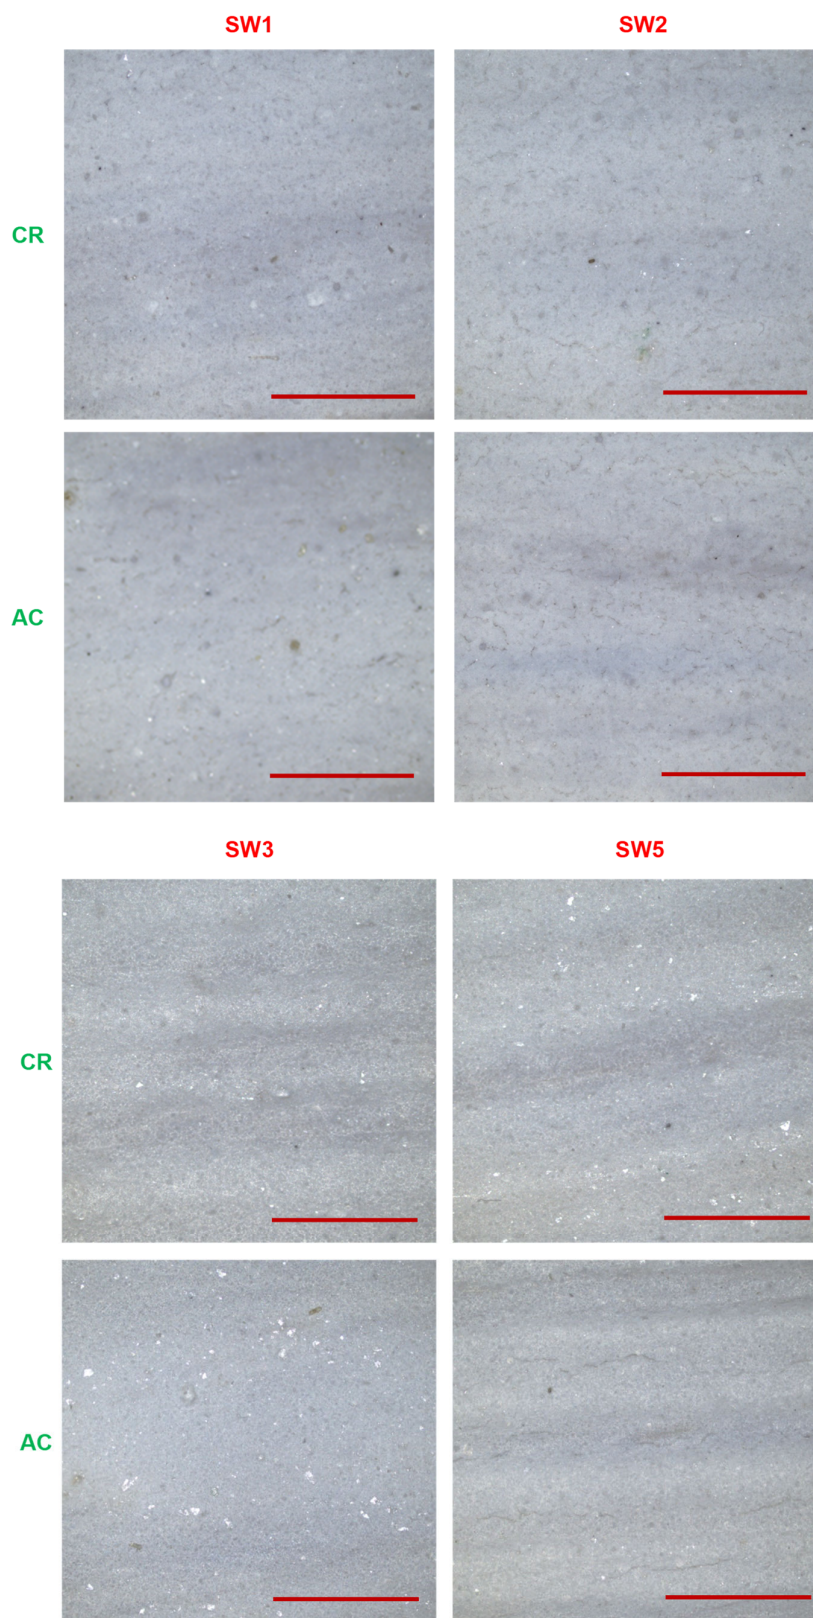

**Figure S3.** 2D micrographs of the surface of the coatings cured in CR and AC at magnification 5 $\times$  (The scale bars represent 1 mm). CR: Climate room ((23 $\pm$ 3)  $^{\circ}$ C and (75 $\pm$ 2) % relative humidity)); AC: ambient conditions ((23 $\pm$ 3)  $^{\circ}$ C and (25 $\pm$ 5) % relative humidity)).

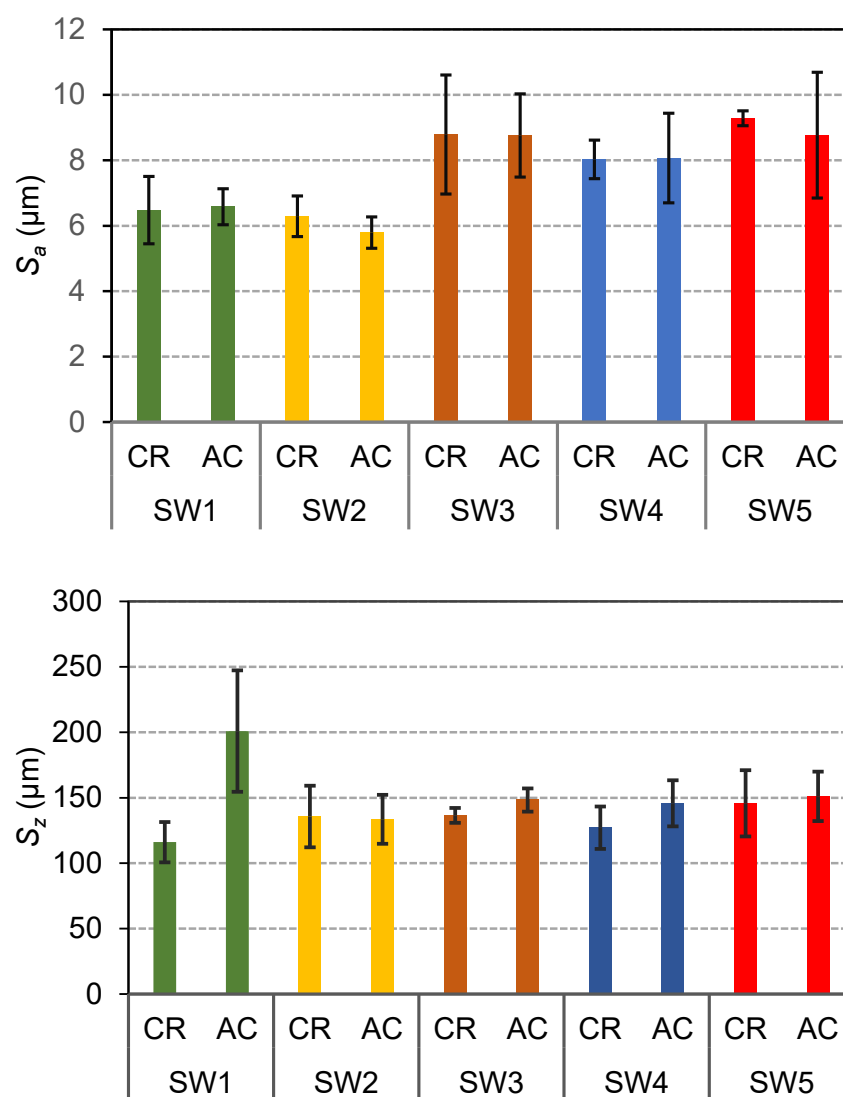

**Figure S4.** Comparison of  $S_a$  and  $S_z$  surface roughness parameters of the coatings cured in CR and AC at magnification 5 $\times$ . CR: Climate room ((23 $\pm$ 3)  $^{\circ}\text{C}$  and (75 $\pm$ 2) % relative humidity)); AC: ambient conditions ((23 $\pm$ 3)  $^{\circ}\text{C}$  and (25 $\pm$ 5) % relative humidity)).
